# Supplementary figures and images for: Geraniol Treatment for Irritable Bowel Syndrome: A Double-Blind Randomized Clinical Trial
Source: MDPI journal article supplement (doi:10.3390/nu14194208), 2022-10-10

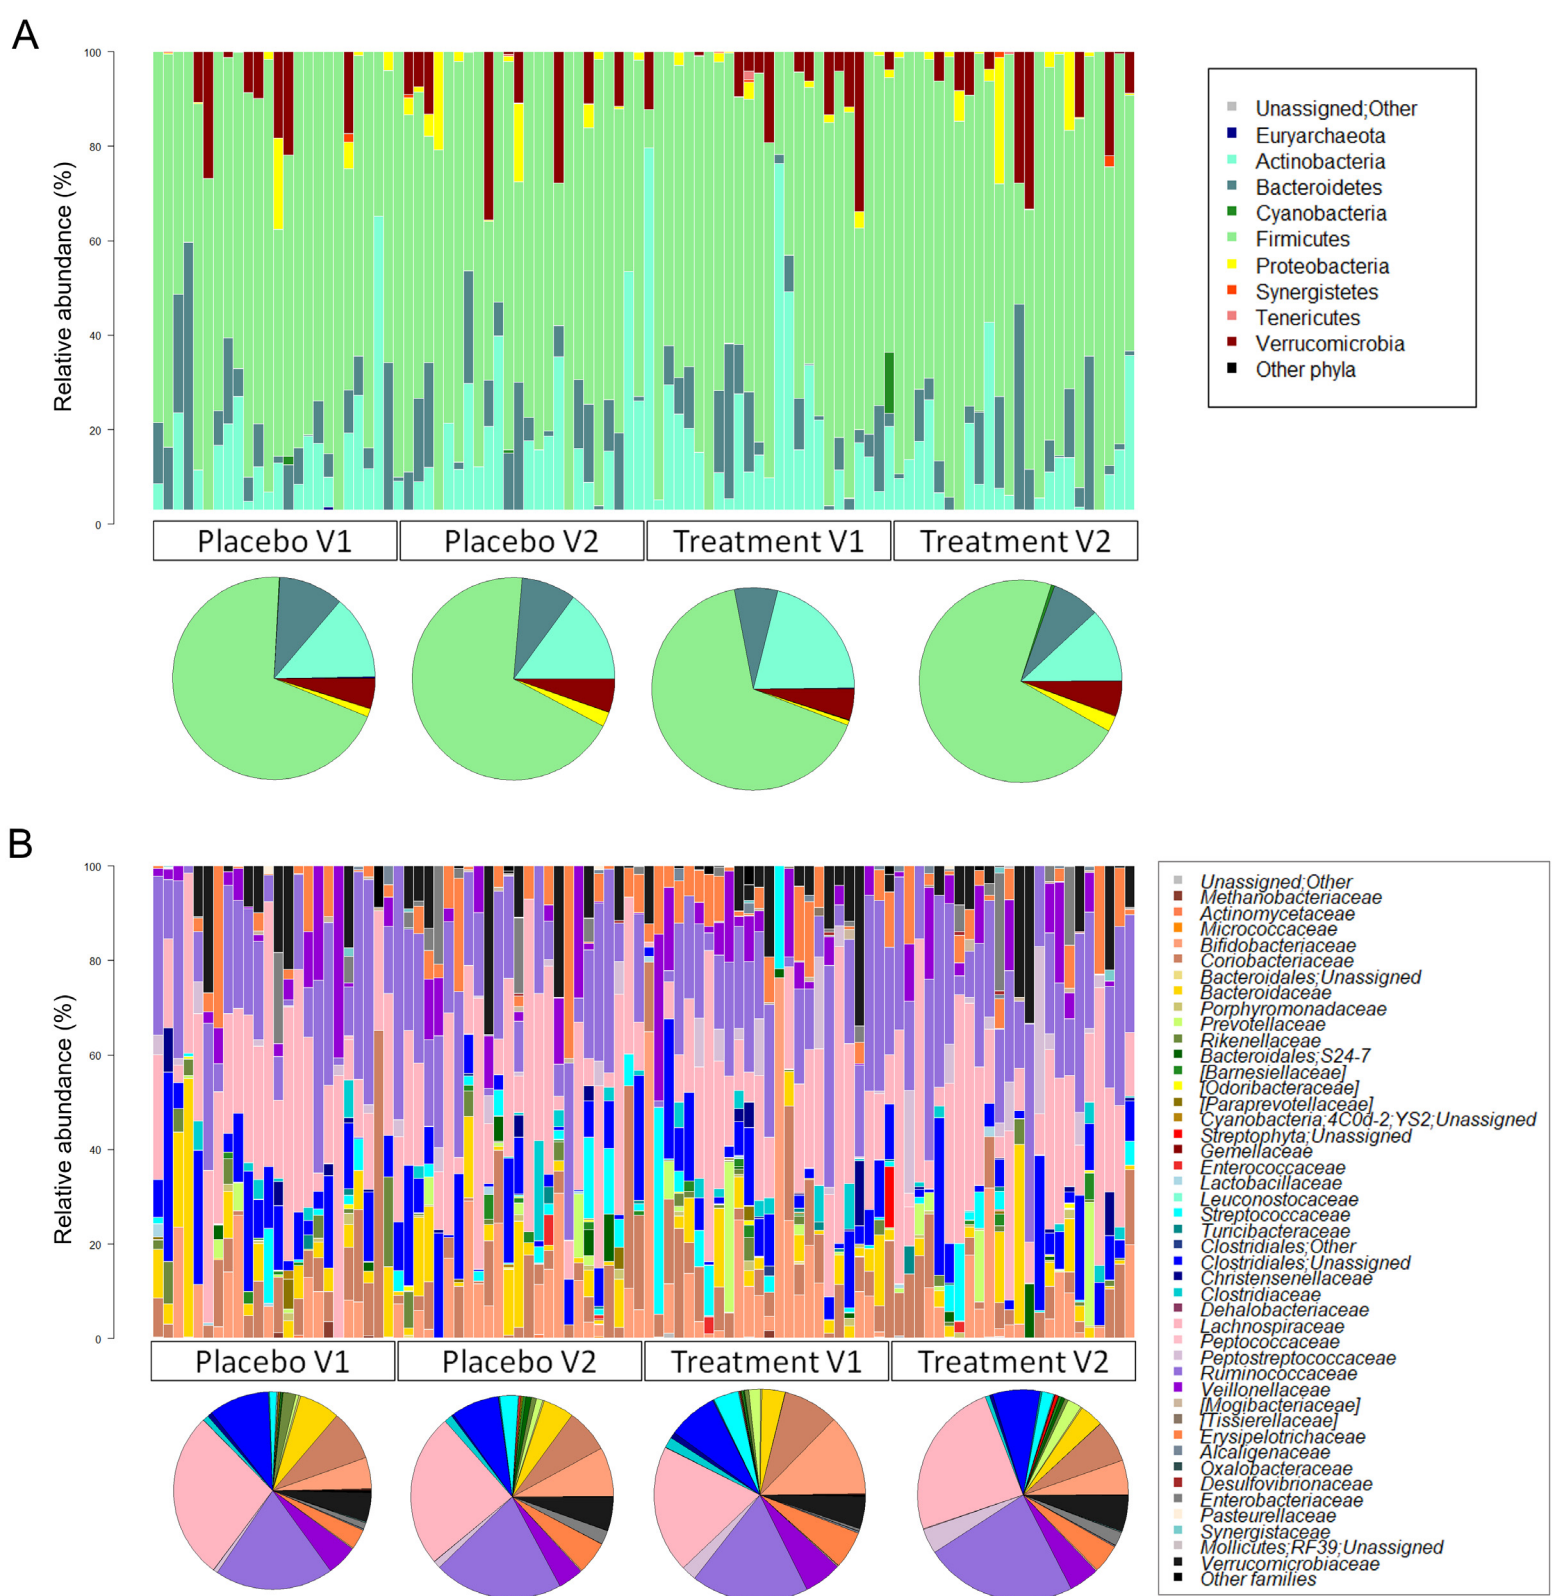

Figure S2

Supplement: s1 [file s1]

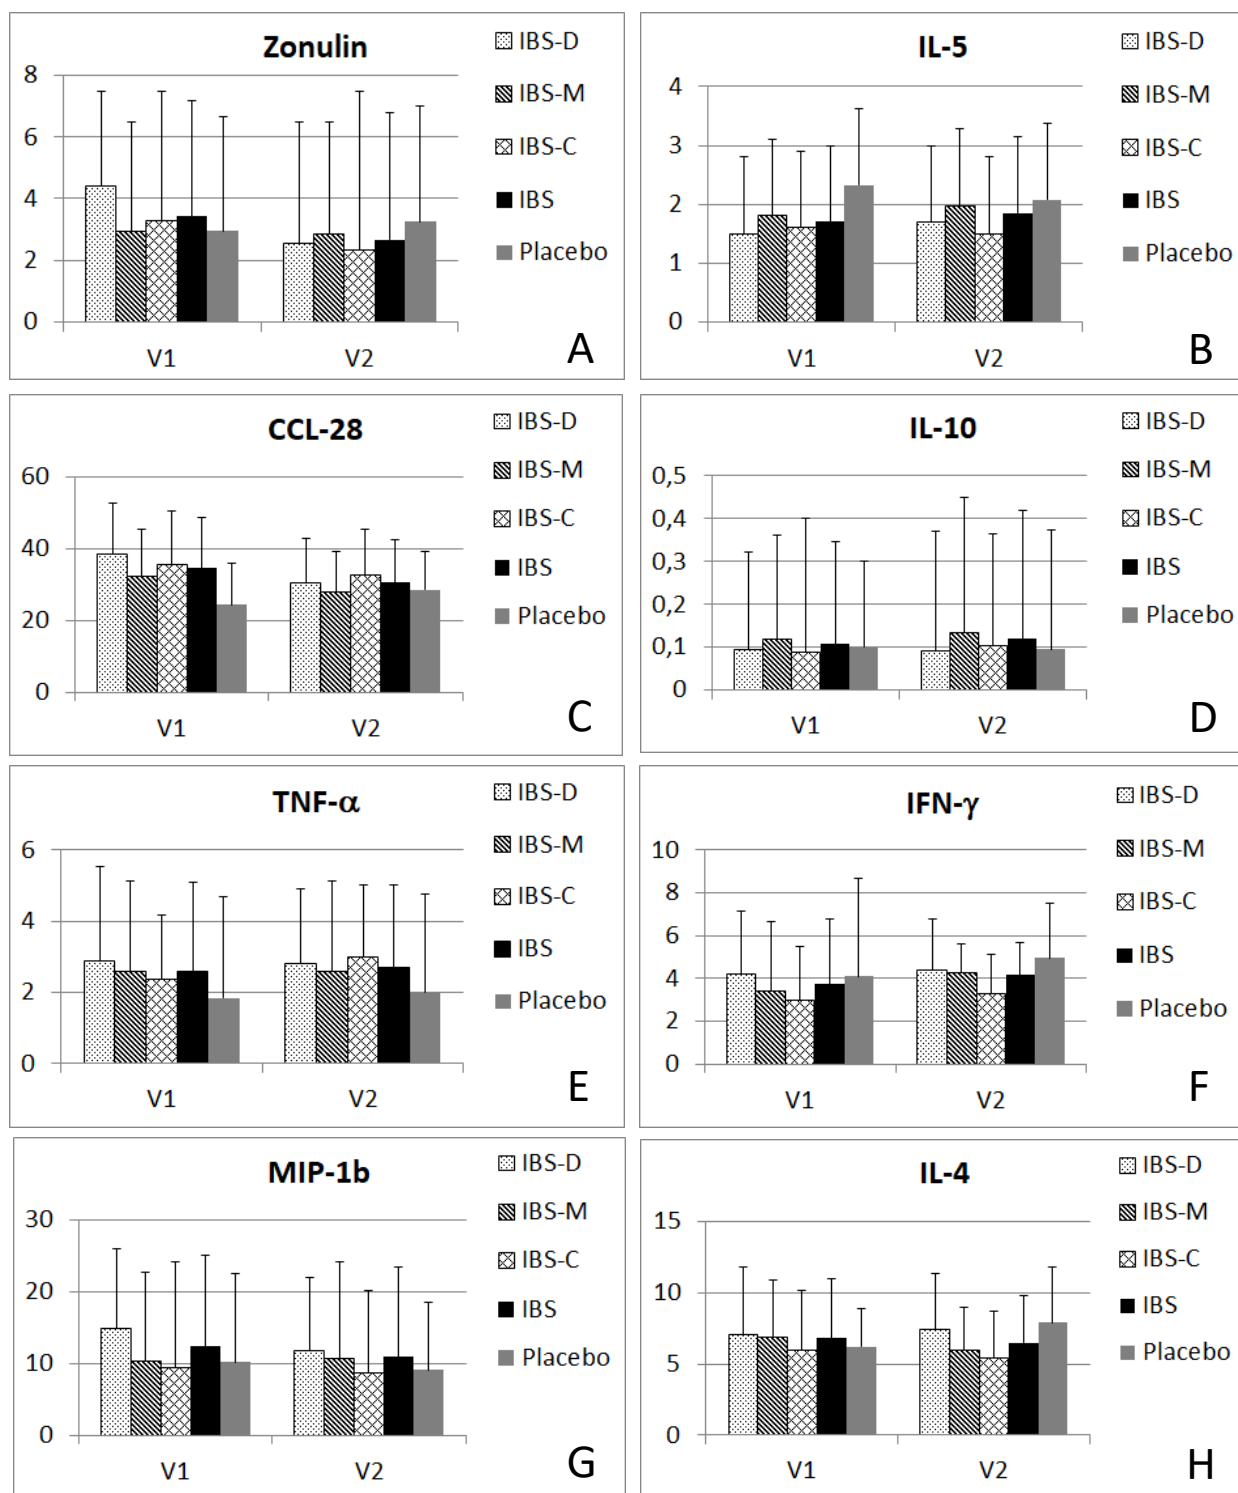

Figure S3

Supplement: s1 [file s1]

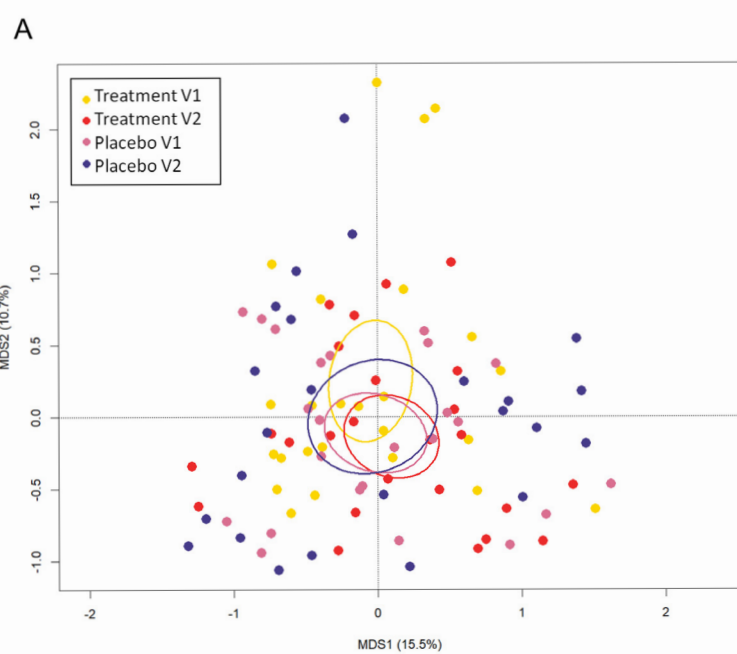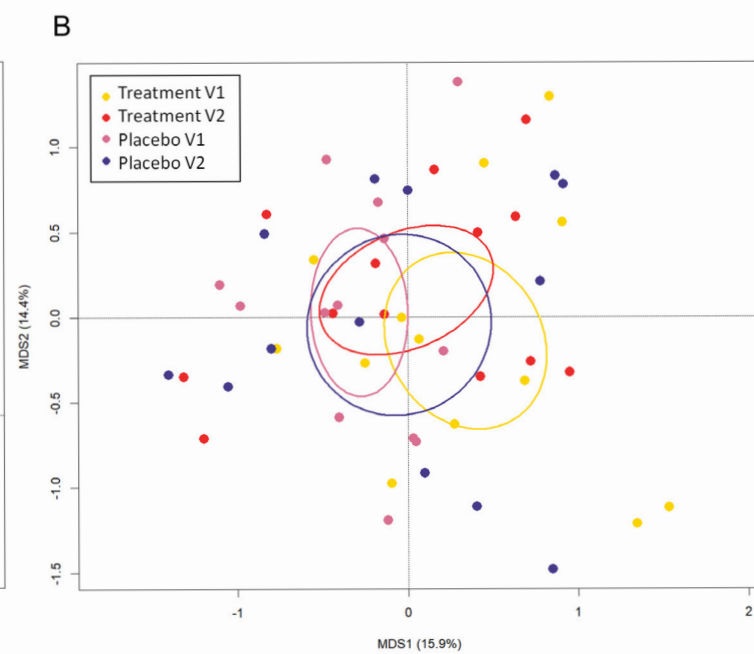

Figure S1

Supplement: s1 [file s1]
